# Supplementary material for: A comparative analysis reveals the dosage sensitivity and regulatory patterns of lncRNA in prostate cancer
Source: Royal Society of Chemistry journal article supplement (doi:10.1039/c6mb00359a), 2016-08-03
Supplement: c6mb00359a1.pdf [file c6mb00359a1.pdf]

## Comparative analysis revealed dosage sensitivity and regulatory patterns of lncRNA in prostate cancer

Yongjing Liu<sup>§</sup>, Rui Zhang<sup>§</sup>, Ning Zhao<sup>§</sup>, Qiang Zhang, Zichuang Yan, Yuanshuai Zhou, Zhiqiang Chang and Yan Xu\*

College of Bioinformatics Science and Technology, Harbin Medical University, Harbin 150081, China

<sup>§</sup>These authors contributed equally to this work

\*Corresponding author

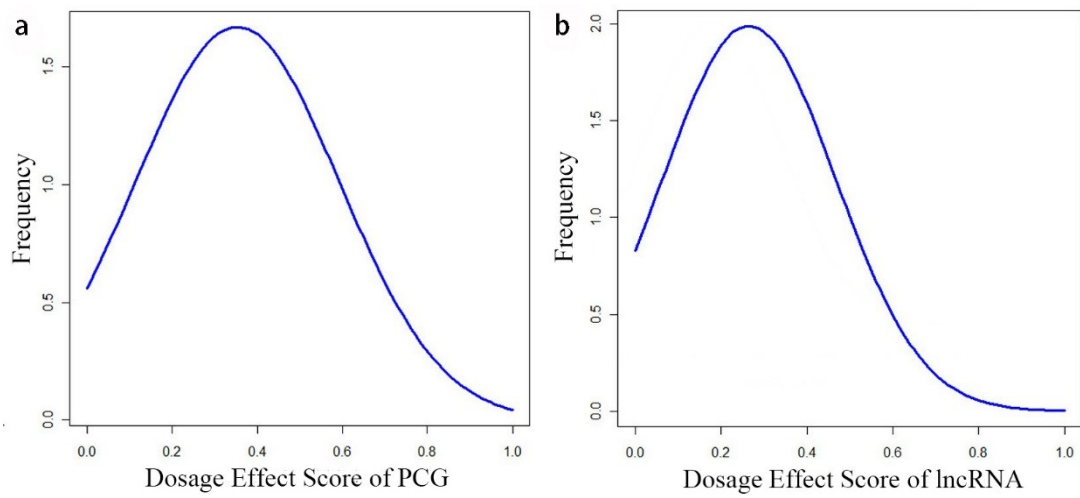

**Supplementary Figure 1 The dosage effect score distributions.**

The two panels are the DES score distributions of PCGs and lncRNAs in prostate cancer. The distribution plot is consistent with Samur et al.'s study.

a

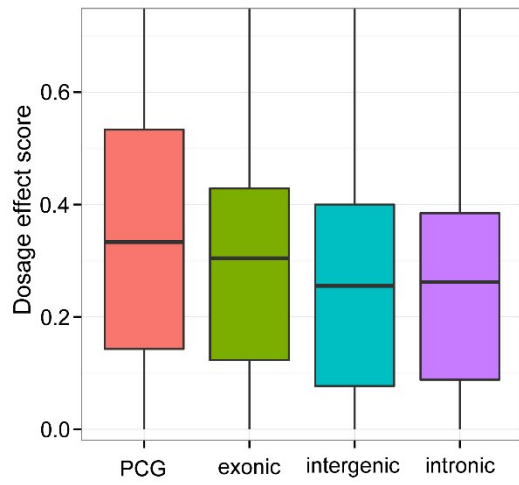

b

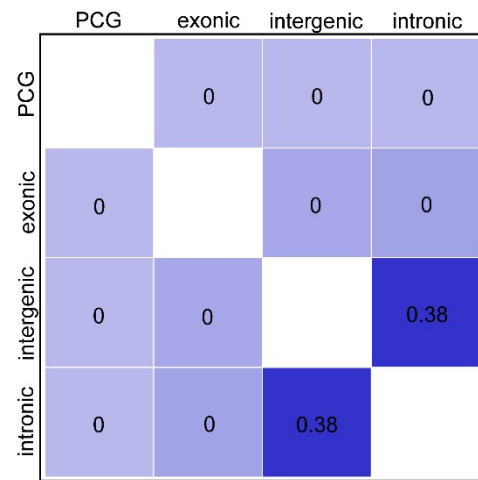

**Supplementary Figure 2 The difference of DES between PCGs and lncRNAs at different genomic locations.**

**Supplementary Table S1 GO terms enriched by PCGs with high dosage sensitivity**

| Category | Term                                                          | Count | P-Value  |
|----------|---------------------------------------------------------------|-------|----------|
| BP       | GO:0030163~protein catabolic process                          | 43    | 1.52E-03 |
| BP       | GO:0009057~macromolecule catabolic process                    | 51    | 1.75E-03 |
|          | GO:0051603~proteolysis involved in cellular protein catabolic |       |          |
| BP       | process                                                       | 41    | 2.43E-03 |
| BP       | GO:0044257~cellular protein catabolic process                 | 41    | 2.69E-03 |
| BP       | GO:0044265~cellular macromolecule catabolic process           | 47    | 3.21E-03 |
| BP       | GO:0007156~homophilic cell adhesion                           | 14    | 3.33E-03 |
| BP       | GO:0008286~insulin receptor signaling pathway                 | 7     | 4.02E-03 |
|          | GO:0007167~enzyme linked receptor protein signaling           |       |          |
| BP       | pathway                                                       | 26    | 4.88E-03 |
|          | GO:0019941~modification-dependent protein catabolic           |       |          |
| BP       | process                                                       | 38    | 5.98E-03 |
|          | GO:0043632~modification-dependent macromolecule               |       |          |
| BP       | catabolic process                                             | 38    | 5.98E-03 |
| BP       | GO:0034329~cell junction assembly                             | 7     | 6.75E-03 |
| BP       | GO:0008104~protein localization                               | 53    | 7.54E-03 |
| BP       | GO:0033554~cellular response to stress                        | 37    | 8.17E-03 |
| BP       | GO:0034330~cell junction organization                         | 8     | 9.33E-03 |
| BP       | GO:0034644~cellular response to UV                            | 3     | 9.91E-03 |
| BP       | GO:0048598~embryonic morphogenesis                            | 23    | 1.00E-02 |
| BP       | GO:0001702~gastrulation with mouth forming second             | 5     | 1.03E-02 |
| BP       | GO:0007049~cell cycle                                         | 47    | 1.04E-02 |
| BP       | GO:0006939~smooth muscle contraction                          | 6     | 1.13E-02 |
|          | GO:0007179~transforming growth factor beta receptor           |       |          |
| BP       | signaling pathway                                             | 8     | 1.22E-02 |
| BP       | GO:0016265~death                                              | 44    | 1.25E-02 |
| BP       | GO:0006511~ubiquitin-dependent protein catabolic process      | 19    | 1.32E-02 |
| BP       | GO:0034613~cellular protein localization                      | 28    | 1.42E-02 |
| BP       | GO:0010876~lipid localization                                 | 14    | 1.46E-02 |
| BP       | GO:0070727~cellular macromolecule localization                | 28    | 1.51E-02 |
| BP       | GO:0006607~NLS-bearing substrate import into nucleus          | 4     | 1.52E-02 |
| BP       | GO:0046907~intracellular transport                            | 40    | 1.76E-02 |
| BP       | GO:0008219~cell death                                         | 43    | 1.78E-02 |
| BP       | GO:0016044~membrane organization                              | 26    | 1.78E-02 |
| BP       | GO:0006869~lipid transport                                    | 13    | 1.86E-02 |
| BP       | GO:0048729~tissue morphogenesis                               | 15    | 1.90E-02 |
| BP       | GO:0060562~epithelial tube morphogenesis                      | 8     | 2.15E-02 |
| BP       | GO:0043966~histone H3 acetylation                             | 5     | 2.18E-02 |
| BP       | GO:0035295~tube development                                   | 17    | 2.26E-02 |
| BP       | GO:0021955~central nervous system neuron axonogenesis         | 4     | 2.28E-02 |
| BP       | GO:0032869~cellular response to insulin stimulus              | 8     | 2.31E-02 |
| BP       | GO:0021915~neural tube development                            | 8     | 2.31E-02 |

|    |                                                                                     |    |          |
|----|-------------------------------------------------------------------------------------|----|----------|
| BP | GO:0043982~histone H4-K8 acetylation                                                | 3  | 2.34E-02 |
| BP | GO:0043981~histone H4-K5 acetylation                                                | 3  | 2.34E-02 |
| BP | GO:0043984~histone H4-K16 acetylation                                               | 3  | 2.34E-02 |
| BP | GO:0070198~protein localization to telomere                                         | 3  | 2.34E-02 |
| BP | GO:0043983~histone H4-K12 acetylation                                               | 3  | 2.34E-02 |
| BP | GO:0001841~neural tube formation                                                    | 6  | 2.48E-02 |
| BP | GO:0021953~central nervous system neuron differentiation                            | 6  | 2.48E-02 |
| BP | GO:0002009~morphogenesis of an epithelium                                           | 10 | 2.55E-02 |
| BP | GO:0007369~gastrulation                                                             | 8  | 2.67E-02 |
| BP | GO:0007178~transmembrane receptor protein serine/threonine kinase signaling pathway | 10 | 2.85E-02 |
| BP | GO:0006644~phospholipid metabolic process                                           | 15 | 2.87E-02 |
| BP | GO:0034502~protein localization to chromosome                                       | 3  | 3.19E-02 |
| BP | GO:0034109~homotypic cell-cell adhesion                                             | 3  | 3.19E-02 |
| BP | GO:0001838~embryonic epithelial tube formation                                      | 6  | 3.27E-02 |
| BP | GO:0016331~morphogenesis of embryonic epithelium                                    | 7  | 3.36E-02 |
| BP | GO:0001843~neural tube closure                                                      | 5  | 3.51E-02 |
| BP | GO:0060606~tube closure                                                             | 5  | 3.51E-02 |
| BP | GO:0035148~tube lumen formation                                                     | 6  | 3.57E-02 |
| BP | GO:0060541~respiratory system development                                           | 10 | 3.70E-02 |
| BP | GO:0043543~protein amino acid acylation                                             | 7  | 3.88E-02 |
| BP | GO:0008637~apoptotic mitochondrial changes                                          | 5  | 3.90E-02 |
| BP | GO:0015031~protein transport                                                        | 43 | 4.02E-02 |
| BP | GO:0019637~organophosphate metabolic process                                        | 15 | 4.16E-02 |
| BP | GO:0016337~cell-cell adhesion                                                       | 19 | 4.19E-02 |
| BP | GO:0000226~microtubule cytoskeleton organization                                    | 12 | 4.45E-02 |
| BP | GO:0045184~establishment of protein localization                                    | 43 | 4.67E-02 |
| BP | GO:0006468~protein amino acid phosphorylation                                       | 38 | 4.72E-02 |
| BP | GO:0014020~primary neural tube formation                                            | 5  | 4.75E-02 |
| BP | GO:0060284~regulation of cell development                                           | 15 | 4.93E-02 |
| BP | GO:0034976~response to endoplasmic reticulum stress                                 | 5  | 5.22E-02 |
| BP | GO:0046328~regulation of JNK cascade                                                | 7  | 5.39E-02 |
| BP | GO:0030900~forebrain development                                                    | 12 | 5.43E-02 |
| BP | GO:0030324~lung development                                                         | 9  | 5.54E-02 |
| BP | GO:0016202~regulation of striated muscle tissue development                         | 6  | 5.70E-02 |
| BP | GO:0045216~cell-cell junction organization                                          | 5  | 5.70E-02 |
| BP | GO:0042060~wound healing                                                            | 14 | 5.80E-02 |
| BP | GO:0032868~response to insulin stimulus                                             | 9  | 5.81E-02 |
| BP | GO:0034660~ncRNA metabolic process                                                  | 16 | 6.06E-02 |
| BP | GO:0007281~germ cell development                                                    | 9  | 6.09E-02 |
| BP | GO:0048634~regulation of muscle development                                         | 6  | 6.11E-02 |
| BP | GO:0030071~regulation of mitotic metaphase/anaphase transition                      | 4  | 6.22E-02 |
| BP | GO:0016192~vesicle-mediated transport                                               | 33 | 6.23E-02 |

|    |                                                                                    |    |          |
|----|------------------------------------------------------------------------------------|----|----------|
| BP | GO:0051149~positive regulation of muscle cell differentiation                      | 3  | 6.29E-02 |
| BP | GO:0032925~regulation of activin receptor signaling pathway                        | 3  | 6.29E-02 |
| BP | GO:0008654~phospholipid biosynthetic process                                       | 9  | 6.38E-02 |
| BP | GO:0030323~respiratory tube development                                            | 9  | 6.38E-02 |
| BP | GO:0006473~protein amino acid acetylation                                          | 6  | 6.54E-02 |
|    | GO:0070302~regulation of stress-activated protein kinase signaling pathway         | 7  | 6.82E-02 |
| BP | GO:0006606~protein import into nucleus                                             | 8  | 6.83E-02 |
| BP | GO:0007286~spermatid development                                                   | 6  | 7.44E-02 |
| BP | GO:0007004~telomere maintenance via telomerase                                     | 3  | 7.49E-02 |
| BP | GO:0031623~receptor internalization                                                | 3  | 7.49E-02 |
| BP | GO:0022402~cell cycle process                                                      | 32 | 7.52E-02 |
| BP | GO:0051170~nuclear import                                                          | 8  | 7.52E-02 |
| BP | GO:0016310~phosphorylation                                                         | 43 | 7.55E-02 |
| BP | GO:0006796~phosphate metabolic process                                             | 51 | 7.55E-02 |
| BP | GO:0006793~phosphorus metabolic process                                            | 51 | 7.55E-02 |
| BP | GO:0009260~ribonucleotide biosynthetic process                                     | 10 | 7.58E-02 |
| BP | GO:0048610~reproductive cellular process                                           | 12 | 7.79E-02 |
| BP | GO:0006461~protein complex assembly                                                | 29 | 7.88E-02 |
| BP | GO:0070271~protein complex biogenesis                                              | 29 | 7.88E-02 |
| BP | GO:0018209~peptidyl-serine modification                                            | 5  | 7.88E-02 |
| BP | GO:0010033~response to organic substance                                           | 39 | 8.18E-02 |
| BP | GO:0030397~membrane disassembly                                                    | 2  | 8.19E-02 |
|    | GO:0031146~SCF-dependent proteasomal ubiquitin-dependent protein catabolic process | 2  | 8.19E-02 |
| BP | GO:0051081~nuclear envelope disassembly                                            | 2  | 8.19E-02 |
| BP | GO:0035239~tube morphogenesis                                                      | 10 | 8.51E-02 |
| BP | GO:0033365~protein localization in organelle                                       | 11 | 8.60E-02 |
| BP | GO:0010833~telomere maintenance via telomere lengthening                           | 3  | 8.74E-02 |
| BP | GO:0032204~regulation of telomere maintenance                                      | 3  | 8.74E-02 |
|    | GO:0021952~central nervous system projection neuron axonogenesis                   | 3  | 8.74E-02 |
|    | GO:0007169~transmembrane receptor protein tyrosine kinase signaling pathway        | 15 | 8.78E-02 |
| BP | GO:0009259~ribonucleotide metabolic process                                        | 11 | 8.90E-02 |
| BP | GO:0048515~spermatid differentiation                                               | 6  | 8.92E-02 |
| BP | GO:0045926~negative regulation of growth                                           | 9  | 8.99E-02 |
| BP | GO:0045766~positive regulation of angiogenesis                                     | 4  | 9.30E-02 |

**Supplementary Table S2 GO terms enriched by PCGs with low dosage sensitivity**

| Category | Term                                                                        | Count | P-Value  |
|----------|-----------------------------------------------------------------------------|-------|----------|
| BP       | GO:0031424~keratinization                                                   | 6     | 2.69E-03 |
| BP       | GO:0030216~keratinocyte differentiation                                     | 7     | 3.65E-03 |
| BP       | GO:0009913~epidermal cell differentiation                                   | 7     | 5.62E-03 |
| BP       | GO:0045761~regulation of adenylate cyclase activity                         | 8     | 5.96E-03 |
| BP       | GO:0031279~regulation of cyclase activity                                   | 8     | 7.03E-03 |
| BP       | GO:0030817~regulation of cAMP biosynthetic process                          | 8     | 7.82E-03 |
| BP       | GO:0051339~regulation of lyase activity                                     | 8     | 7.82E-03 |
| BP       | GO:0030814~regulation of cAMP metabolic process                             | 8     | 8.67E-03 |
| BP       | GO:0030802~regulation of cyclic nucleotide biosynthetic process             | 8     | 1.22E-02 |
| BP       | GO:0030808~regulation of nucleotide biosynthetic process                    | 8     | 1.22E-02 |
| BP       | GO:0030799~regulation of cyclic nucleotide metabolic process                | 8     | 1.40E-02 |
| BP       | GO:0006140~regulation of nucleotide metabolic process                       | 8     | 1.60E-02 |
| BP       | GO:0050731~positive regulation of peptidyl-tyrosine phosphorylation         | 5     | 2.11E-02 |
| BP       | GO:0006913~nucleocytoplasmic transport                                      | 9     | 2.51E-02 |
| BP       | GO:0051169~nuclear transport                                                | 9     | 2.68E-02 |
| BP       | GO:0007616~long-term memory                                                 | 3     | 2.88E-02 |
| BP       | GO:0055085~transmembrane transport                                          | 21    | 3.31E-02 |
| BP       | GO:0051350~negative regulation of lyase activity                            | 5     | 3.52E-02 |
| BP       | GO:0031280~negative regulation of cyclase activity                          | 5     | 3.52E-02 |
| BP       | GO:0007190~activation of adenylate cyclase activity                         | 5     | 3.52E-02 |
| BP       | GO:0007194~negative regulation of adenylate cyclase activity                | 5     | 3.52E-02 |
| BP       | GO:0045762~positive regulation of adenylate cyclase activity                | 5     | 3.72E-02 |
| BP       | GO:0031281~positive regulation of cyclase activity                          | 5     | 3.94E-02 |
| BP       | GO:0007611~learning or memory                                               | 7     | 3.96E-02 |
| BP       | GO:0007188~G-protein signaling, coupled to cAMP nucleotide second messenger | 6     | 4.29E-02 |
| BP       | GO:0051349~positive regulation of lyase activity                            | 5     | 4.38E-02 |
| BP       | GO:0008272~sulfate transport                                                | 3     | 4.38E-02 |
| BP       | GO:0009953~dorsal/ventral pattern formation                                 | 5     | 4.61E-02 |
| BP       | GO:0051091~positive regulation of transcription factor activity             | 5     | 4.61E-02 |
| BP       | GO:0030282~bone mineralization                                              | 3     | 4.94E-02 |
| BP       | GO:0001934~positive regulation of protein amino acid phosphorylation        | 6     | 5.06E-02 |
| BP       | GO:0010817~regulation of hormone levels                                     | 8     | 5.50E-02 |
| BP       | GO:0050890~cognition                                                        | 29    | 5.72E-02 |
| BP       | GO:0048754~branching morphogenesis of a tube                                | 5     | 5.88E-02 |

|    |                                                                                              |    |          |
|----|----------------------------------------------------------------------------------------------|----|----------|
| BP | GO:0060348~bone development                                                                  | 7  | 5.98E-02 |
| BP | GO:0010578~regulation of adenylyate cyclase activity involved in G-protein signaling         | 4  | 6.08E-02 |
| BP | GO:0007193~inhibition of adenylyate cyclase activity by G-protein signaling                  | 4  | 6.08E-02 |
| BP | GO:0010579~positive regulation of adenylyate cyclase activity by G-protein signaling pathway | 4  | 6.08E-02 |
| BP | GO:0007189~activation of adenylyate cyclase activity by G-protein signaling pathway          | 4  | 6.08E-02 |
| BP | GO:0009595~detection of biotic stimulus                                                      | 3  | 6.11E-02 |
| BP | GO:0019933~cAMP-mediated signaling                                                           | 6  | 6.35E-02 |
| BP | GO:0032497~detection of lipopolysaccharide                                                   | 2  | 6.61E-02 |
| BP | GO:0050730~regulation of peptidyl-tyrosine phosphorylation                                   | 5  | 6.72E-02 |
| BP | GO:0032755~positive regulation of interleukin-6 production                                   | 3  | 6.73E-02 |
| BP | GO:0042327~positive regulation of phosphorylation                                            | 6  | 6.82E-02 |
| BP | GO:0035270~endocrine system development                                                      | 5  | 7.01E-02 |
| BP | GO:0060429~epithelium development                                                            | 10 | 7.21E-02 |
| BP | GO:0043388~positive regulation of DNA binding                                                | 5  | 7.31E-02 |
| BP | GO:0019935~cyclic-nucleotide-mediated signaling                                              | 7  | 7.39E-02 |
| BP | GO:0045597~positive regulation of cell differentiation                                       | 10 | 7.50E-02 |
| BP | GO:0010562~positive regulation of phosphorus metabolic process                               | 6  | 7.55E-02 |
| BP | GO:0045937~positive regulation of phosphate metabolic process                                | 6  | 7.55E-02 |
| BP | GO:0046903~secretion                                                                         | 12 | 7.80E-02 |
| BP | GO:0003002~regionalization                                                                   | 9  | 7.81E-02 |
| BP | GO:0051090~regulation of transcription factor activity                                       | 6  | 8.33E-02 |
| BP | GO:0001763~morphogenesis of a branching structure                                            | 5  | 8.58E-02 |
| BP | GO:0060441~branching involved in lung morphogenesis                                          | 2  | 8.72E-02 |
| BP | GO:0060438~trachea development                                                               | 2  | 8.72E-02 |
| BP | GO:0021569~rhombomere 3 development                                                          | 2  | 8.72E-02 |
| BP | GO:0030855~epithelial cell differentiation                                                   | 7  | 8.98E-02 |
| BP | GO:0043410~positive regulation of MAPKKK cascade                                             | 4  | 9.36E-02 |
| BP | GO:0048706~embryonic skeletal system development                                             | 5  | 9.59E-02 |
| BP | GO:0009952~anterior/posterior pattern formation                                              | 7  | 9.71E-02 |
| BP | GO:0009914~hormone transport                                                                 | 4  | 9.81E-02 |
| BP | GO:0051099~positive regulation of binding                                                    | 5  | 9.94E-02 |
| BP | GO:0051094~positive regulation of developmental process                                      | 11 | 9.97E-02 |



**Supplementary table S3 GO terms enriched by lncRNA ENSG00000250303**

| Category | Term                                                           | Count | P-Value  |
|----------|----------------------------------------------------------------|-------|----------|
| BP       | GO:0006631~fatty acid metabolic process                        | 10    | 6.49E-12 |
| BP       | GO:0009062~fatty acid catabolic process                        | 5     | 2.45E-07 |
| BP       | GO:0019395~fatty acid oxidation                                | 5     | 3.41E-07 |
| BP       | GO:0034440~lipid oxidation                                     | 5     | 3.41E-07 |
| BP       | GO:0030258~lipid modification                                  | 5     | 3.47E-06 |
| BP       | GO:0044242~cellular lipid catabolic process                    | 5     | 5.12E-06 |
| BP       | GO:0016054~organic acid catabolic process                      | 5     | 2.31E-05 |
| BP       | GO:0046395~carboxylic acid catabolic process                   | 5     | 2.31E-05 |
| BP       | GO:0016042~lipid catabolic process                             | 5     | 1.30E-04 |
| BP       | GO:0006633~fatty acid biosynthetic process                     | 4     | 2.36E-04 |
| BP       | GO:0055114~oxidation reduction                                 | 7     | 3.20E-04 |
| BP       | GO:0006635~fatty acid beta-oxidation                           | 3     | 8.47E-04 |
| BP       | GO:0016053~organic acid biosynthetic process                   | 4     | 1.69E-03 |
| BP       | GO:0046394~carboxylic acid biosynthetic process                | 4     | 1.69E-03 |
| BP       | GO:0001561~fatty acid alpha-oxidation                          | 2     | 6.20E-03 |
| BP       | GO:0008610~lipid biosynthetic process                          | 4     | 1.30E-02 |
| BP       | GO:0006637~acyl-CoA metabolic process                          | 2     | 2.46E-02 |
| BP       | GO:0000038~very-long-chain fatty acid metabolic process        | 2     | 2.91E-02 |
| BP       | GO:0008543~fibroblast growth factor receptor signaling pathway | 2     | 4.41E-02 |
| BP       | GO:0051781~positive regulation of cell division                | 2     | 5.89E-02 |
| BP       | GO:0051302~regulation of cell division                         | 2     | 7.05E-02 |
